# Supplementary material
Source: MDPI journal article supplement (https://www.mdpi.com/2311-7524/7/11/480)
Supplement: s1 [file s1]

# Supplementary Materials: Seed Micromorphology, *In Vitro* Germination, and Early-Stage Seedling Morphological Traits of *Cattleya purpurata* (Lindl. & Paxton) Van den Berg

Miriam Bazzicalupo <sup>1,\*</sup>, Jacopo Calevo <sup>2,\*</sup>, Martino Adamo <sup>2,3</sup>, Annalisa Giovannini <sup>4</sup>, Andrea Copetta <sup>4</sup> and Laura Cornara <sup>1</sup>

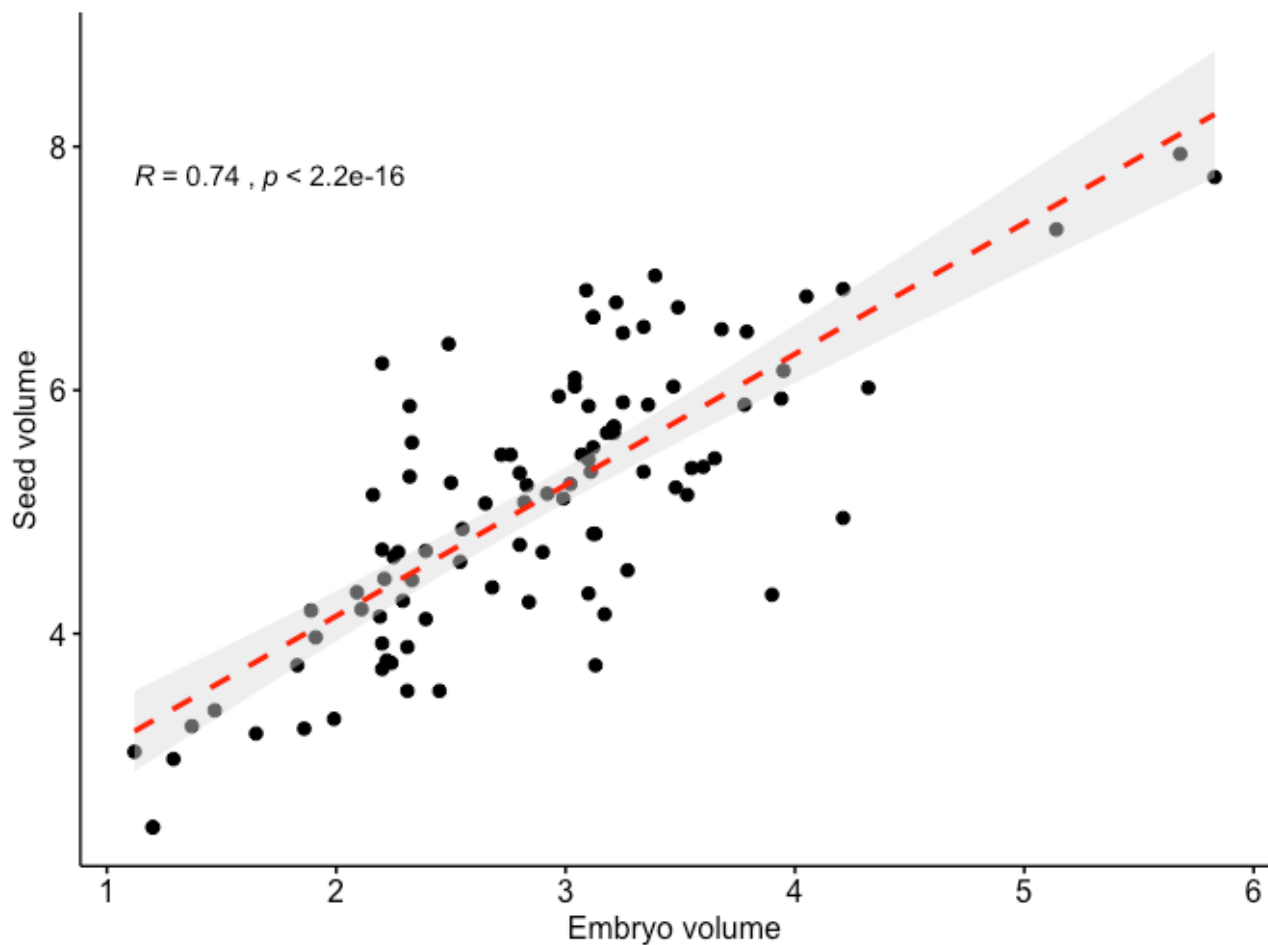

**Figure S1.** Correlation between the volume of the embryo and the seed analyzed by means of the `cor.test()` function using the Spearman's rank correlation coefficient  $\rho$ .

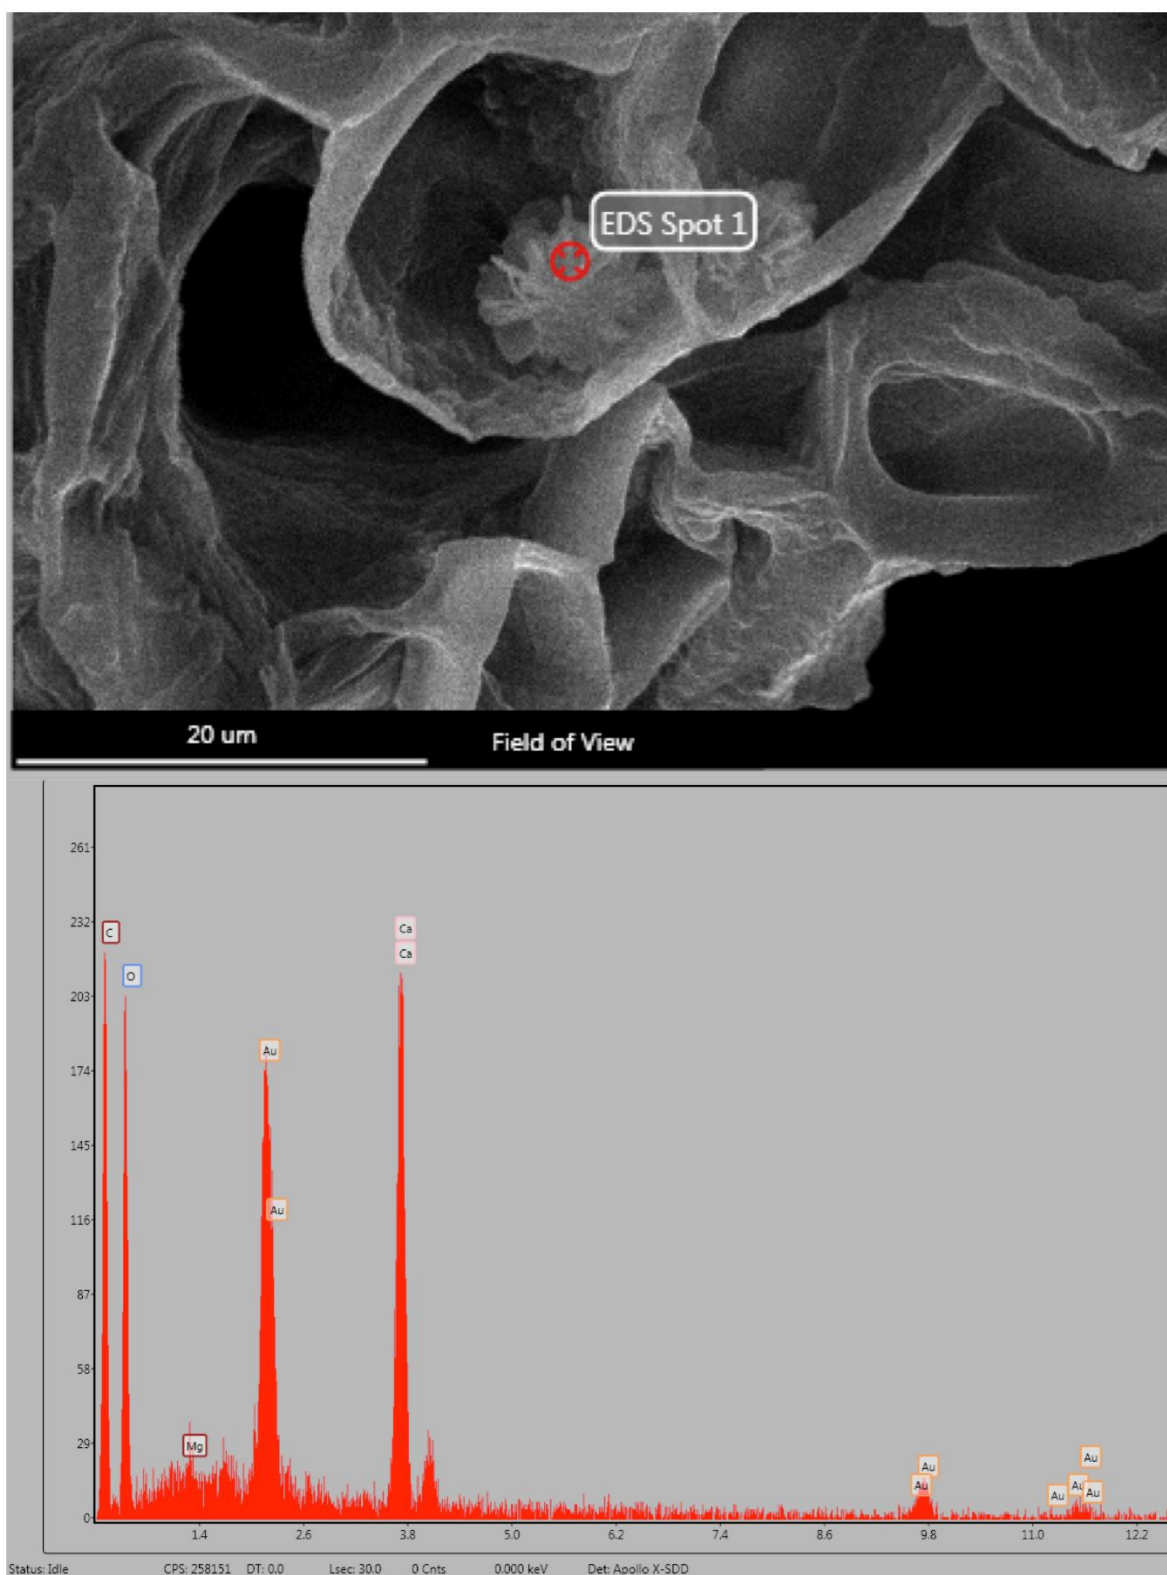

**Figure S2.** Main elements present in crystals determined by SEM-EDS spectrum. The analysis showed a chemical composition typically obtained for calcium oxalate, with carbon (C), oxygen (O) and calcium (Ca) peaks.
